# Supplementary material for: Two-dimensional arsenene polymorph beyond the auxetic foam: high mechanical sensitivity and large, negative NPR
Source: Royal Society of Chemistry journal article supplement (doi:10.1039/d0cp05604a), 2021-01-01
Supplement: d0cp05604a1.pdf [file d0cp05604a1.pdf]

**Supplementary Information**

**Two-dimensional Arsenene Polymorph Beyond the  
Auxetic Foam: High Mechanical Sensitivity and  
Large, Negative NPR**

Authors: Yifan Gao, Minru Wen, Shaoxiong Wang, Hao Yu, Xin Zhang,  
Fugen Wu, Huafeng Dong\*.

Author's affiliations:

Yifan Gao, Minru Wen, Shaoxiong Wang, Hao Yu, Xin Zhang, Huafeng  
Dong: School of Physics and Optoelectronic Engineering, Guangdong  
University of Technology, Guangzhou 510006, China

Fugen Wu: School of Materials and Energy, Guangdong University of  
Technology, Guangzhou 510006, China

Corresponding author: Huafeng Dong

E-mail: [hfdong@gdut.edu.cn](mailto:hfdong@gdut.edu.cn)

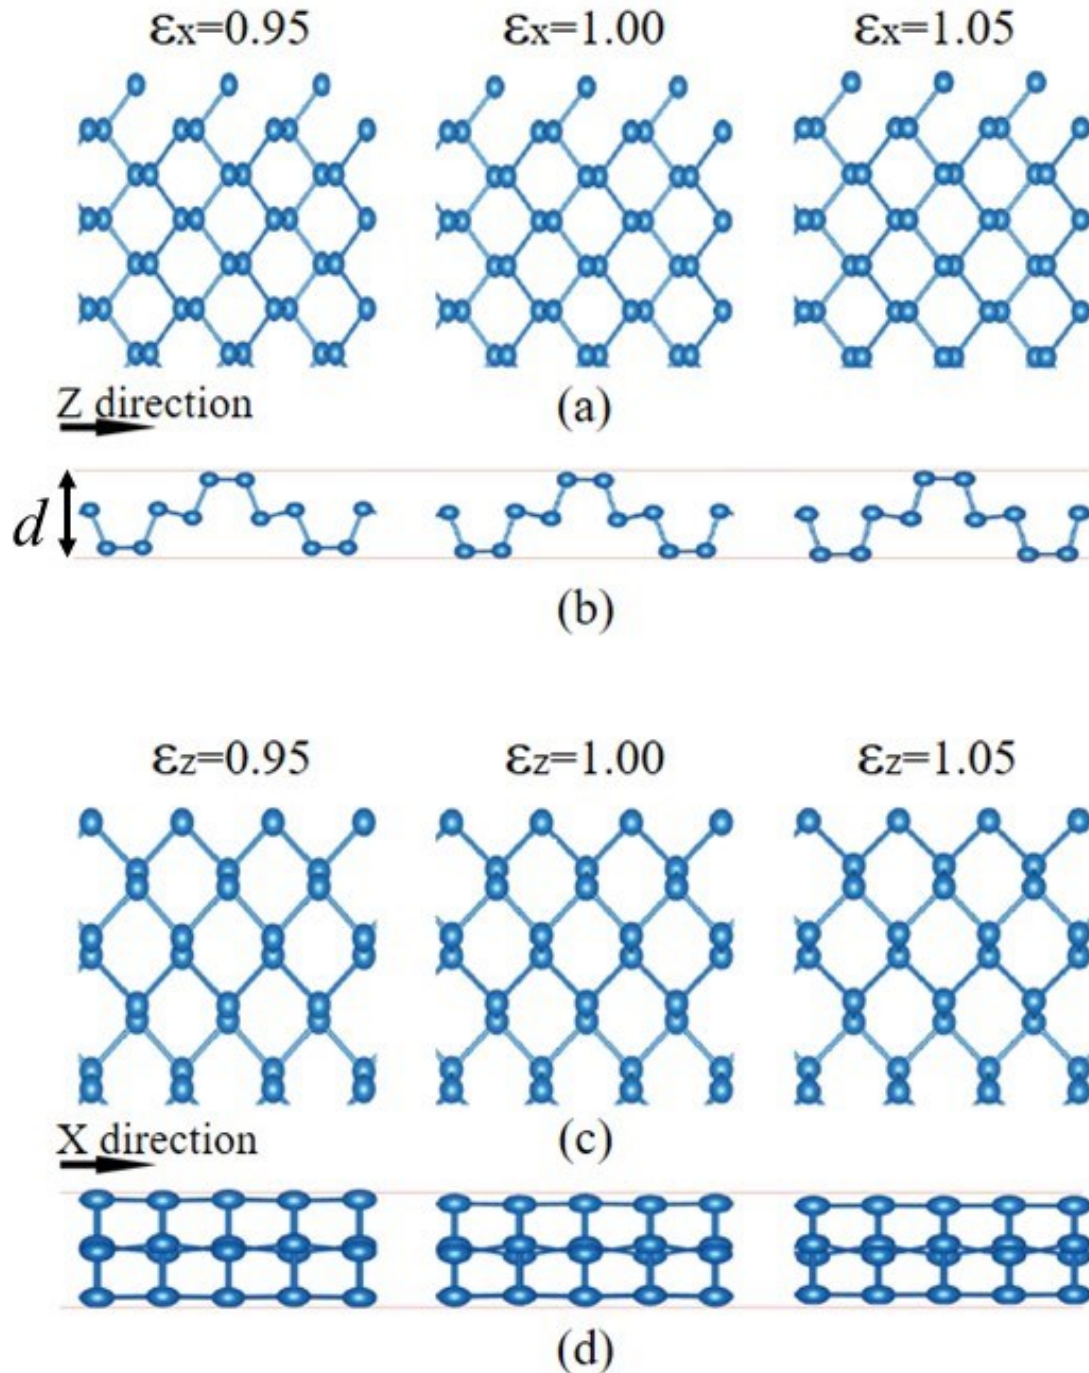

**Figure S1** (a) Top views of the configuration of single-layer  $\delta$ -As under uniaxial deformation at strain states of  $\epsilon=0.95$ ,  $1.00$ ,  $1.05$  in the X direction. (b) Side views of the configuration of single-layer  $\delta$ -As under uniaxial deformation at strain states of  $\epsilon=0.95$ ,  $1.00$ ,  $1.05$  in the X direction. (c) Top views of the configuration of single-layer  $\delta$ -As under uniaxial deformation at strain states of  $\epsilon=0.95$ ,  $1.00$ ,  $1.05$  in the Z direction. (d) Side views of the configuration of single-layer  $\delta$ -As under uniaxial deformation at strain states of  $\epsilon=0.95$ ,  $1.00$ ,  $1.05$  in the Z direction.

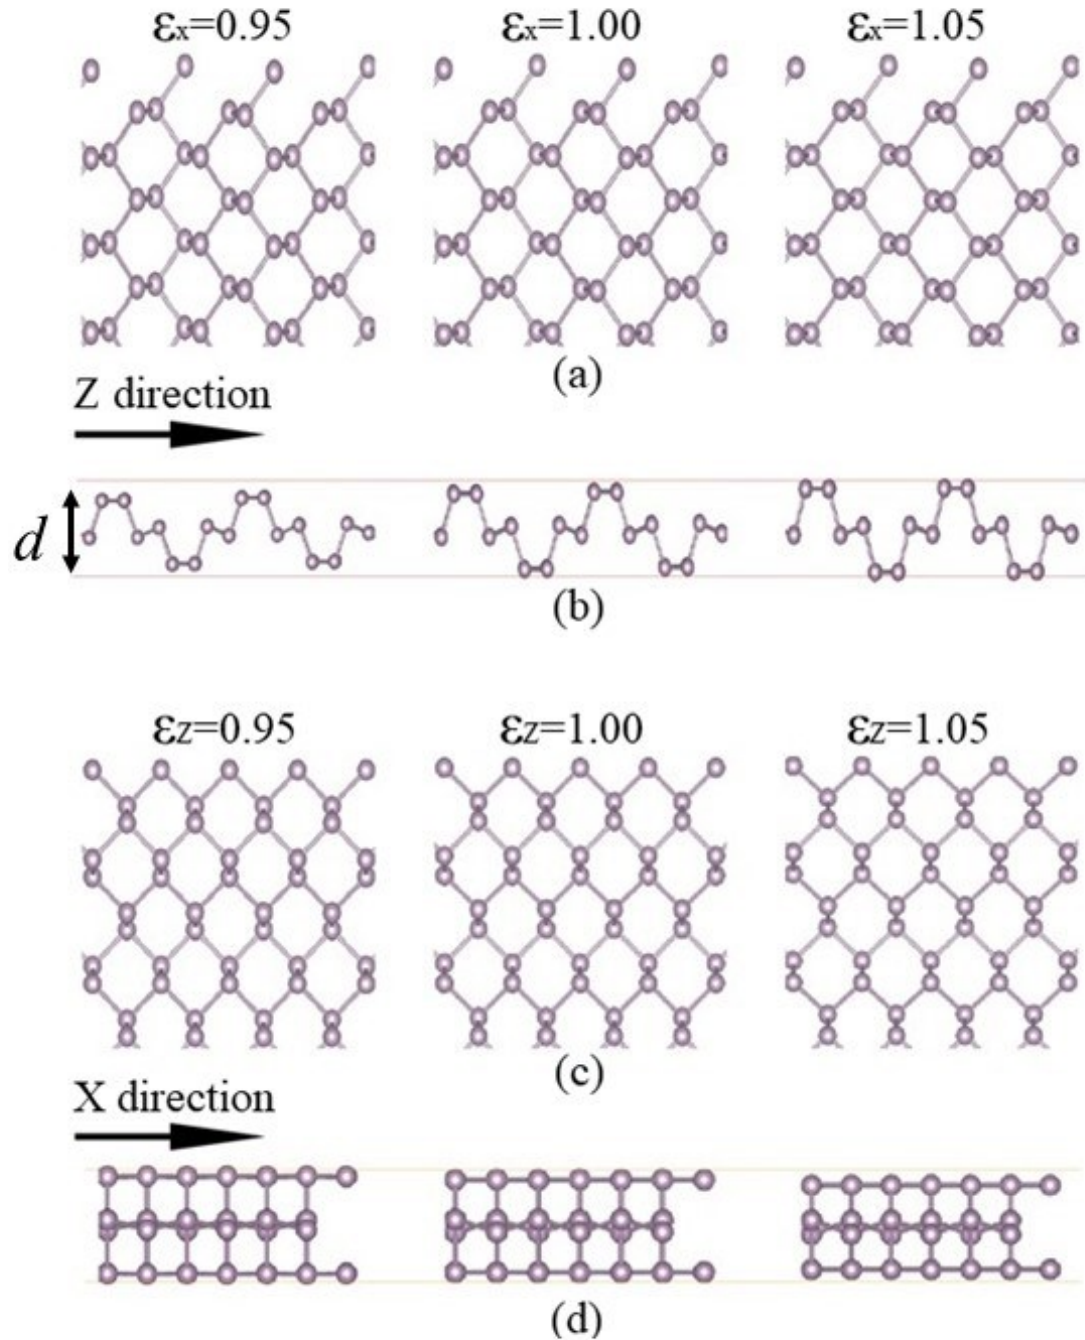

**Figure S2** (a) Top views of the configuration of single-layer  $\gamma$ -P under the X-direction deformation at strain states of  $\epsilon=0.95$ ,  $1.00$ ,  $1.05$ . (b) Side views of the configuration of single-layer  $\gamma$ -P under the X-direction deformation at strain states of  $\epsilon=0.95$ ,  $1.00$ ,  $1.05$ . (c) Top views of the configuration of single-layer  $\gamma$ -P under the Z-direction deformation at strain states of  $\epsilon=0.95$ ,  $1.00$ ,  $1.05$ . (d) Side views of the configuration of single-layer  $\gamma$ -P under the Z-direction deformation at strain states of  $\epsilon=0.95$ ,  $1.00$ ,  $1.05$ .

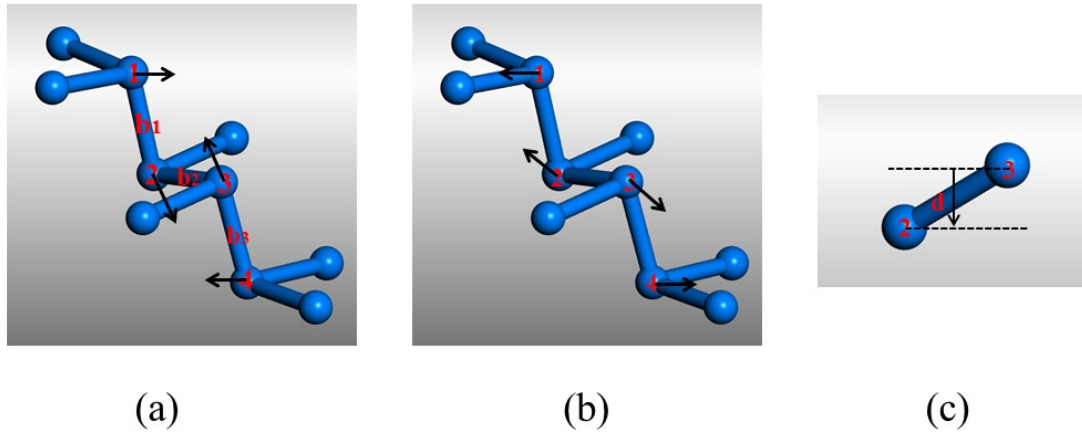

**Figure S3** Evolution of local structure in single-layer  $\delta$ -As during uniaxial tension in the X direction. (a) Single-layer  $\delta$ -As is stretched in the X direction, that is, atoms are moved in the direction of the attached arrows (black online). (b) Single-layer  $\delta$ -As is contracts in the X direction, that is, atoms are moved in the direction of the attached arrows (black online). (c) Vertical distance  $d$  between atoms 2 and 3 under the X-direction uniaxial tension and compression strain.

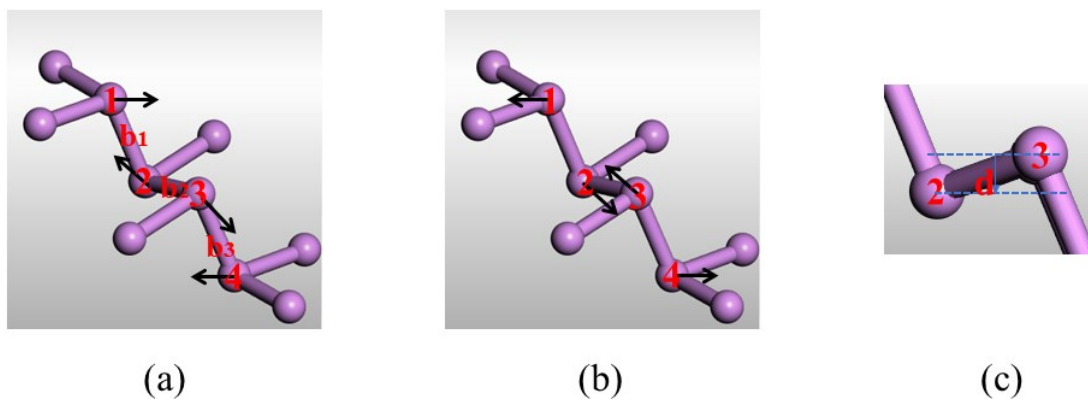

**Figure S4** Evolution of local structure in single-layer  $\gamma$ -P during uniaxial tension in the X direction. (a) Single-layer  $\gamma$ -P is stretched in the X direction, that is, atoms are moved in the direction of the attached arrows (black online). (b)  $\gamma$ -P is contracts in the X direction, that is, atoms are moved in the direction of the attached arrows (black online). (c) Vertical distance  $d$  between atoms 2 and 3 under the X-direction uniaxial tension and compression strain.
